# Supplementary material
Source: MDPI journal article supplement (https://www.mdpi.com/2311-7524/10/5/465)

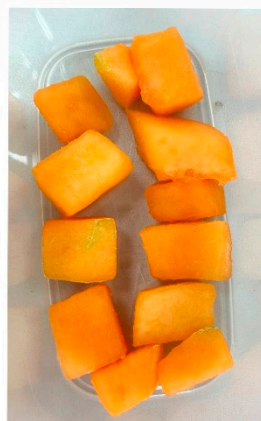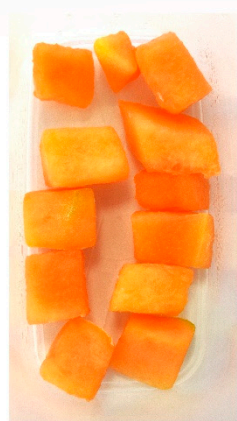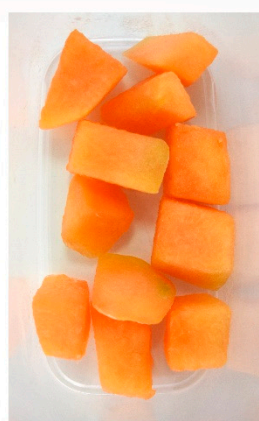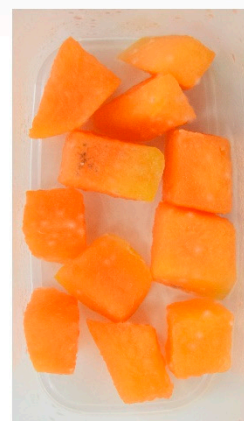

U

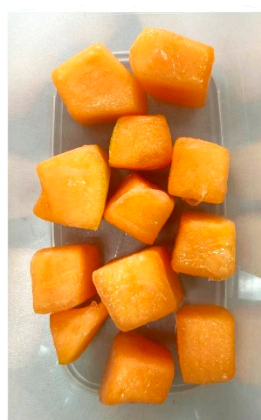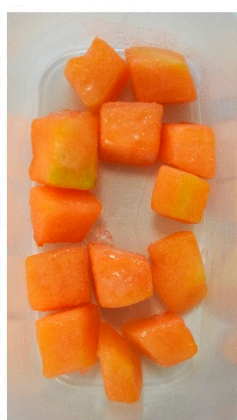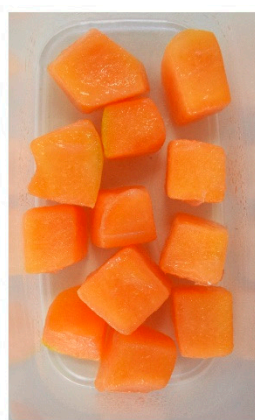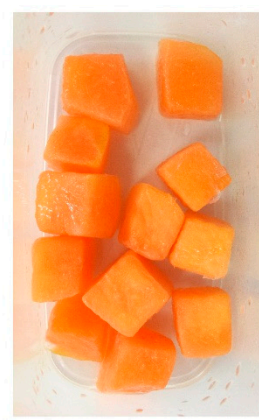

C

0

5

10

15

Figure S1: Images of uncoated (U) and coated (C) fresh-cut melons during 15 days of storage at 4 °C.

Supplement: s1 [file s1]
